# Supplementary material for: A novel purification method of activated carbon-supported carbon nanotubes using a mixture of Ca(OH)2 and KOH as the ablation agent
Source: Royal Society of Chemistry journal article supplement (doi:10.1039/d0ra08346a), 2021-01-01
Supplement: d0ra08346a1.pdf [file d0ra08346a1.pdf]

### Supporting Materials

A novel purification method of activated carbon-supported carbon nanotubes using  
the mixture of  $\text{Ca}(\text{OH})_2$  and KOH as the ablation agent

Yongjie Hu<sup>a</sup>, Linlin Zhang<sup>a</sup>, Qixun Guo<sup>a</sup>, Zhifeng Zheng<sup>a</sup>, Yunquan Liu<sup>a</sup>, Yueyuan

Ye<sup>a</sup>, Shuirong Li<sup>a</sup>, Xingyong Jia<sup>b</sup>, Duo Wang<sup>a,\*</sup>

<sup>a</sup> Fujian Engineering and Research Center of Clean and High-valued Technologies for  
Biomass, College of Energy, Xiamen University, Xiamen, P.R. China. 361102.

<sup>b</sup> Graduate School of Chinese Academy of Agricultural Sciences, Beijing, China.  
100081.

\*Corresponding author. Tel: +86 5922188266; Fax: +86 5922188053; E-mail address:  
[duowang@xmu.edu.cn](mailto:duowang@xmu.edu.cn)

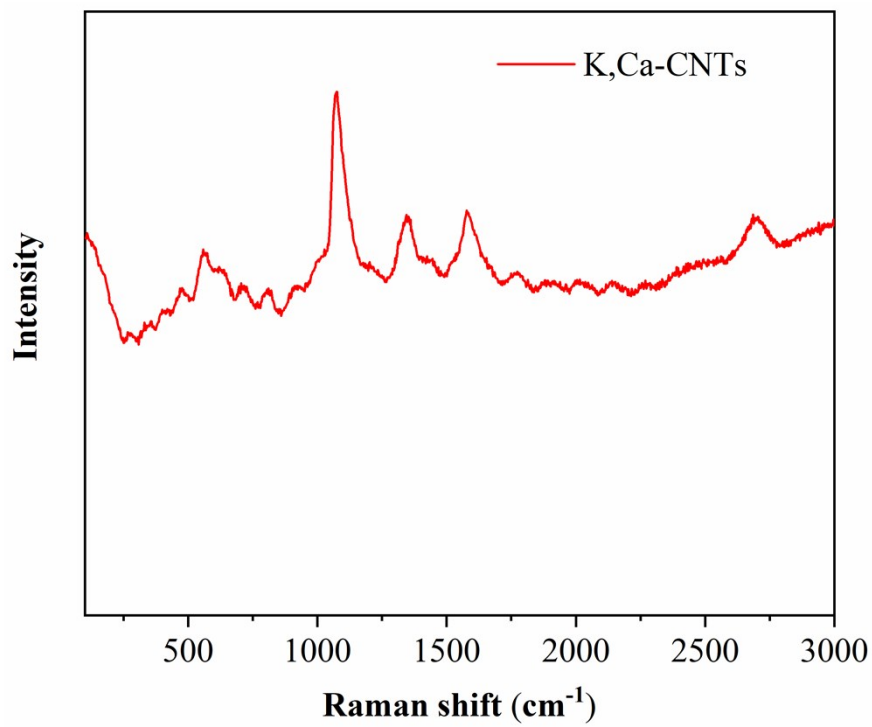

Figure S1. Raman spectra of K, Ca-CNTs.

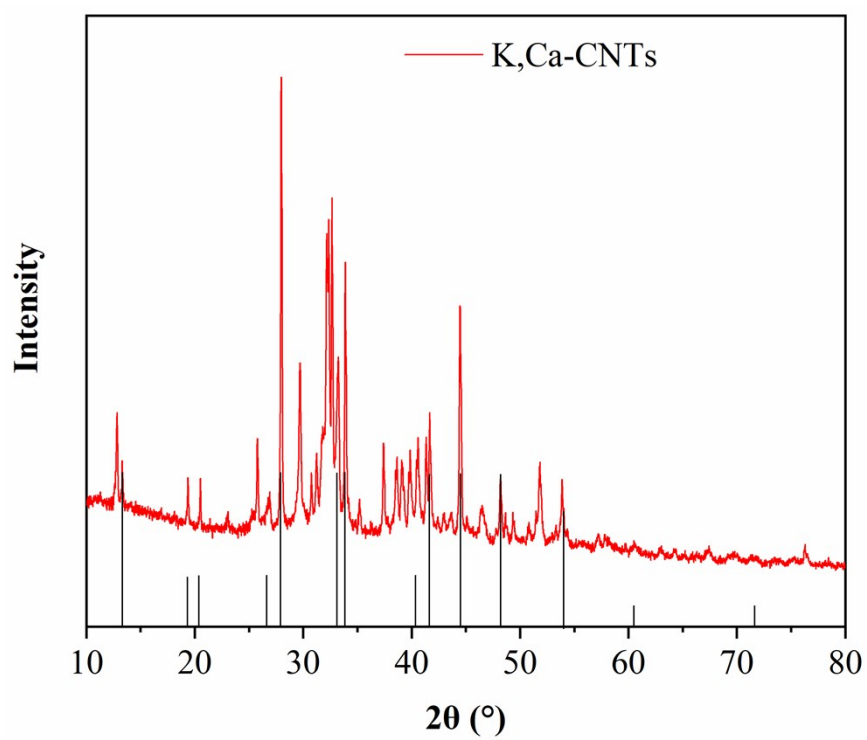

Figure S2. XRD spectra of K, Ca-CNTs.
